# Supplementary material for: MoS2/Pt nanocomposite-functionalized microneedle for real-time monitoring of hydrogen peroxide release from living cells
Source: Royal Society of Chemistry journal article supplement (doi:10.1039/c7an01446e), 2017-01-01
Supplement: c7an01446e1.pdf [file c7an01446e1.pdf]

## **Supporting Information:**

# **MoS<sub>2</sub>/ Pt nanocomposites functionalized microneedle for real-time monitoring of hydrogen peroxide release from living cell**

Jin-Xiu Zhou<sup>a</sup>, Li-Na Tang<sup>a,b</sup>, Fan Yang<sup>a</sup>, Feng-Xia Liang<sup>b,c</sup>, Hua Wang<sup>b,c</sup>, Yu-Tao

Li<sup>\*a,b</sup>, Guo-Jun Zhang<sup>\*a,b</sup>

<sup>a</sup> School of Laboratory Medicine, Hubei University of Chinese Medicine, 1 Huangjia  
Lake West Road, Wuhan 430065, PR China.

<sup>b</sup> Hubei Provincial Collaborative Innovation Center of Preventive Treatment, 1  
Huangjia Lake West Road, Wuhan 430065, PR China.

<sup>c</sup> Department of Acupuncture and Moxibustion, Hubei University of Chinese  
Medicine, 1 Huangjia Lake West Road, Wuhan 430065, PR China.

\*Corresponding author: Tel: +86-27-68890259, Fax: +86-27-68890259

Email: zhanggj@hbtcu.edu.cn

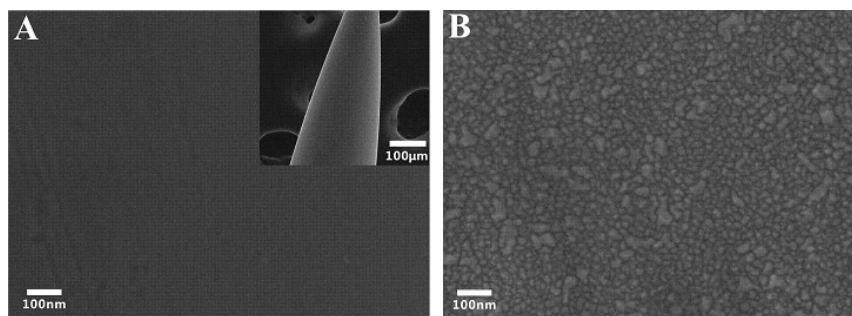

Figure S1. SEM images of (A) bare acupuncture needle (Inset: the whole image of the tip) and (B) AuNPs decorated acupuncture needle.

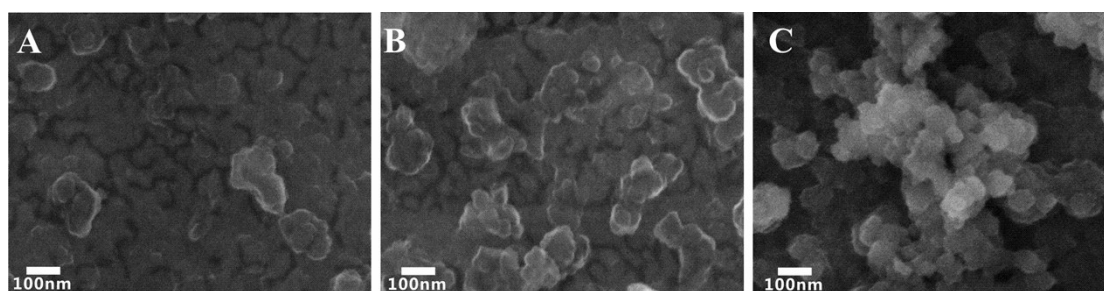

Figure S2. SEM images of MoS<sub>2</sub>/AN when the electrochemical polymerization time of MoS<sub>2</sub> is for 15s、30s、 and 45s, respectively.

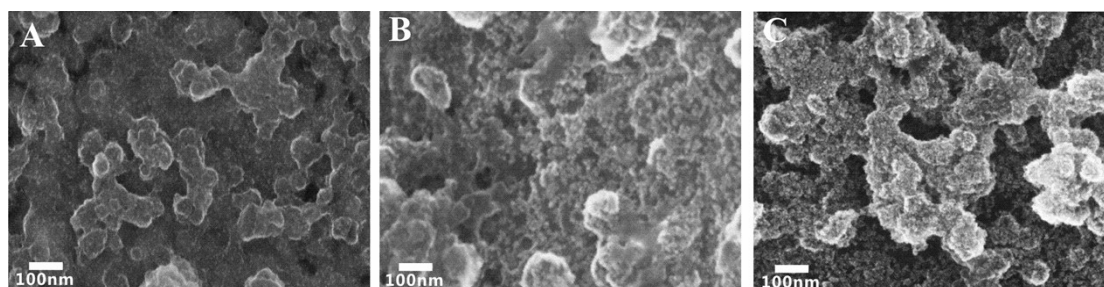

Figure S3. SEM images of MoS<sub>2</sub>/PtNPs/AN when the electrochemical polymerization time of PtNPs is for 200s、300s、 and 400s, respectively.

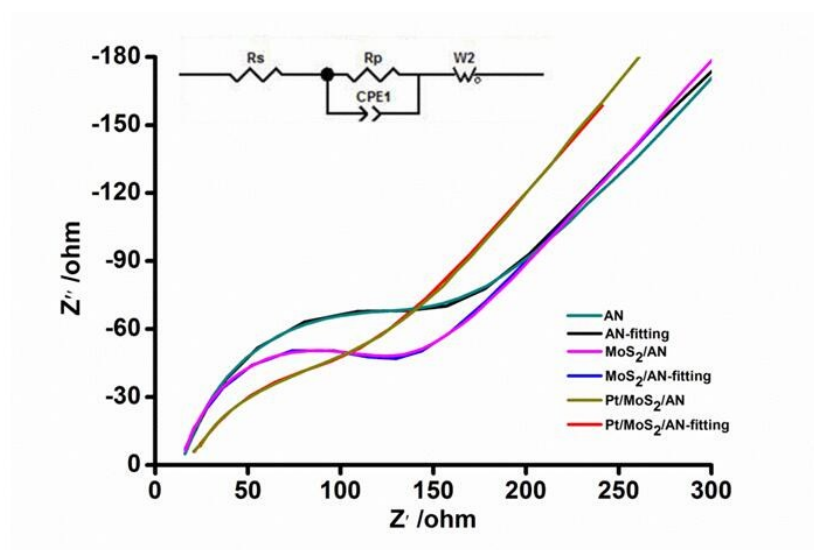

Figure S4. Nyquist plots of EIS and the corresponding fitting curve at the different nanomaterial-modified acupuncture needle in aqueous solution consisting of 5 mmol/L of  $K_3[Fe(CN)_6]$  and 0.1 mol/L of KCl.
